# Supplementary material for: Whole-Genome Sequencing and iPLEX MassARRAY Genotyping Map an EMS-Induced Mutation Affecting Cell Competition in Drosophila melanogaster
Source: PubMed Central journal article supplement (PMC5068942; doi:10.1534/g3.116.029421), 2016-08-29
Supplement: supp_g3.116.029421_TableS1.pdf [file supp_g3.116.029421_TableS1.pdf]

| Nearest Gene                           | Position of first affected base (dm3, +BDGP Release 5) |                | Reference allele | M2-73 allele |
|----------------------------------------|--------------------------------------------------------|----------------|------------------|--------------|
| CG9853                                 | 225260                                                 | exonic         | C                | T            |
| Karybeta3                              | 478577                                                 | exonic         | C                | T            |
| CG9769(dist=1161),Nep2(dist=4441)      | 541079                                                 | intergenic     | A                | T            |
| laf(dist=18914),Gnf1(dist=9178)        | 723169                                                 | intergenic     | AC               | -            |
| Cdep                                   | 739543                                                 | intronic       | T                | C            |
| CG12162                                | 1293555                                                | UTR5           | C                | T            |
| CG12162                                | 1293804                                                | exonic         | C                | T            |
| CG2182                                 | 1482663                                                | exonic         | G                | A            |
| cas                                    | 1540780                                                | exonic         | C                | T            |
| CG1213                                 | 1670267                                                | UTR5           | C                | T            |
| CG34113                                | 1721515                                                | intronic       | C                | T            |
| CG34113                                | 1759141                                                | intronic       | C                | T            |
| Gasp                                   | 1916463                                                | intronic       | GGGGG            | -            |
| CR43487(dist=16330),CG31559(dist=5831) | 1970007                                                | intergenic     | C                | G            |
| CR43487(dist=16374),CG31559(dist=5787) | 1970051                                                | intergenic     | T                | G            |
| pb                                     | 2540921                                                | intronic       | C                | T            |
| pb                                     | 2546021                                                | intronic       | C                | T            |
| pb                                     | 2552104                                                | intronic       | C                | T            |
| Antp                                   | 2725936                                                | intronic       | T                | A            |
| gfzf                                   | 2971904                                                | UTR3           | -                | T            |
| rn                                     | 3107401                                                | intronic       | TT               | -            |
| rn                                     | 3120765                                                | intronic       | G                | A            |
| CG42656                                | 3318847                                                | exonic         | C                | T            |
| alpha-Est9                             | 3326499                                                | intronic       | T                | A            |
| CG34127                                | 3464407                                                | intronic       | T                | -            |
| CG7918                                 | 3893648                                                | intronic       | C                | T            |
| stck                                   | 4181938                                                | upstream       | A                | T            |
| CG42796                                | 4413751                                                | intronic       | G                | T            |
| CG8861                                 | 5131508                                                | intronic       | A                | G            |
| CG12951                                | 5155076                                                | exonic         | C                | T            |
| Teh1                                   | 5664303                                                | intronic       | G                | A            |
| Cyp12e1(dist=52162),hth(dist=20981)    | 6314588                                                | intergenic     | C                | T            |
| CG34304                                | 6485686                                                | intronic       | A                | T            |
| CG4073(dist=7083),tomboy20(dist=12364) | 6548704                                                | intergenic     | T                | C            |
| CG14692                                | 6624796                                                | exonic         | T                | A            |
| Ugt86Dg                                | 6991157                                                | exonic         | C                | T            |
| scpr-A                                 | 7067546                                                | exonic         | A                | C            |
| CR43283(dist=5290),CG31386(dist=7990)  | 7087135                                                | intergenic     | T                | -            |
| CR31386                                | 7114355                                                | ncRNA_intronic | G                | A            |

|                                        |          |                |         |     |
|----------------------------------------|----------|----------------|---------|-----|
| pros                                   | 7194791  | intronic       | C       | T   |
| pros                                   | 7204868  | intronic       | G       | T   |
| CG17230,sals                           | 7277135  | intronic       | T       | G   |
| dpr4                                   | 7366533  | intronic       | C       | T   |
| Csk                                    | 7473937  | intronic       | C       | T   |
| CG6959                                 | 7685751  | intronic       | T       | A   |
| CG6959(dist=2470),sad(dist=5304)       | 7697653  | intergenic     | C       | T   |
| Tk                                     | 7824003  | intronic       | T       | A   |
| Tk(dist=1119),KLHL18(dist=1519)        | 7832313  | intergenic     | G       | C   |
| dpr15                                  | 7983267  | intronic       | C       | T   |
| CG12360                                | 8855443  | exonic         | T       | A   |
| CG8795(dist=4490),CG8784(dist=1310)    | 9164375  | intergenic     | T       | G   |
| CG8795(dist=4492),CG8784(dist=1308)    | 9164377  | intergenic     | A       | T   |
| yellow-e(dist=3714),Ir87a(dist=1275)   | 9244720  | intergenic     | -       | TTT |
| CR17025(dist=50882),CG12538(dist=5963) | 9342710  | intergenic     | C       | T   |
| sqd                                    | 9461430  | UTR3           | C       | T   |
| ffl                                    | 9516871  | exonic         | C       | T   |
| f-                                     |          |                |         |     |
| cup(NM_001104302:exon11:c.1570+1G>A)   | 9522158  | splicing       | C       | T   |
| CG34383                                | 9555776  | intronic       | AA      | -   |
| foxo                                   | 9891161  | intronic       | C       | T   |
| foxo                                   | 9894633  | intronic       | G       | T   |
| NK7.1                                  | 10175674 | UTR5           | TTCGTTT | -   |
| eff                                    | 10565610 | intronic       | C       | T   |
| btsz                                   | 10672825 | intronic       | C       | T   |
| btsz(dist=2268),CG17304(dist=3133)     | 10681894 | intergenic     | C       | T   |
| CG3837(dist=24364),CG14861(dist=68102) | 10772390 | intergenic     | C       | T   |
| CG6966                                 | 10917764 | intronic       | C       | T   |
| CG18516(dist=54064),CG5302(dist=26047) | 11432558 | intergenic     | T       | C   |
| alpha-Man-IIb                          | 11636076 | intronic       | T       | C   |
| alpha-Man-IIb                          | 11638939 | intronic       | C       | T   |
| Akt1(dist=8129),Sb(dist=16083)         | 11938368 | intergenic     | C       | T   |
| tara                                   | 12085124 | exonic         | C       | T   |
| gish                                   | 12106865 | intronic       | T       | C   |
| Gyc-89Da                               | 12300066 | exonic         | C       | T   |
| CG42342                                | 12330162 | intronic       | T       | A   |
| CG42342                                | 12387772 | intronic       | C       | T   |
| CG12783                                | 12438631 | intronic       | C       | T   |
| Fas1                                   | 12459192 | intronic       | -       | AA  |
| abd-A                                  | 12639159 | intronic       | C       | T   |
| msa                                    | 12714205 | ncRNA_intronic | C       | T   |
| msa                                    | 12739737 | ncRNA_intronic | C       | T   |
| Abd-B                                  | 12769839 | UTR5           | G       | A   |
| CG8907                                 | 12835080 | intronic       | -       | A   |

|                                         |          |            |         |        |
|-----------------------------------------|----------|------------|---------|--------|
| Mur89F(dist=31852),CG31262(dist=25316)  | 13017522 | intergenic | A       | -      |
| beat-IIb(dist=34080),CG31418(dist=1839) | 13107678 | intergenic | G       | A      |
| CR43490(dist=27900),beat-IIa(dist=3281) | 13142440 | intergenic | C       | T      |
| Sur-8                                   | 13226189 | intronic   | C       | T      |
| Dscam3                                  | 13311395 | intronic   | C       | T      |
| CG5840                                  | 13361974 | exonic     | T       | A      |
| CG7606(dist=1389),sll(dist=7796)        | 13424028 | intergenic | C       | T      |
| Pxt                                     | 13546523 | exonic     | C       | T      |
| CG7357                                  | 13633414 | exonic     | C       | T      |
| Rim                                     | 13700747 | UTR3       | GT      | -      |
| Rim                                     | 13715688 | intronic   | C       | A      |
| CG42457,cpo                             | 13786879 | intronic   | C       | T      |
| cpo                                     | 13842839 | UTR3       | -       | AA     |
| CG7794(dist=17887),htl(dist=1949)       | 13868987 | intergenic | A       | -      |
| sr(dist=11147),CG14316(dist=7223)       | 13970618 | intergenic | AA      | -      |
| fru                                     | 14328221 | intronic   | C       | T      |
| fray                                    | 14414725 | UTR3       | -       | AA     |
| CG14304                                 | 14442241 | intronic   | -       | TTT    |
| CG34282(dist=6757),VACHT(dist=2919)     | 14528255 | intergenic | G       | C      |
| Cha                                     | 14550803 | intronic   | C       | T      |
| CG7720                                  | 14593268 | intronic   | A       | C      |
| CG31226                                 | 14676688 | downstream | C       | T      |
| CG14298(dist=1870),CG14297(dist=19045)  | 14704798 | intergenic | C       | T      |
| Xrp1                                    | 14751213 | exonic     | G       | T      |
| CG42613                                 | 14761313 | intronic   | G       | -      |
| CG42613                                 | 14784129 | UTR5       | AA      | -      |
| gukh                                    | 14823055 | intronic   | C       | T      |
| P5cr                                    | 14855628 | exonic     | C       | T      |
| cdi                                     | 14880956 | intronic   | AAAAACA | -      |
| CG31475                                 | 15024903 | intronic   | C       | T      |
| CG14280(dist=2091),CR43451(dist=26384)  | 15087695 | intergenic | -       | AA     |
| DI                                      | 15136668 | intronic   | C       | T      |
| DI                                      | 15151328 | UTR5       | TGTGTG  | -      |
| CG42793(dist=4996),Ino80(dist=9115)     | 15185602 | intergenic | -       | T      |
| Dys                                     | 15414123 | intronic   | C       | T      |
| Naam                                    | 15524594 | downstream | C       | T      |
| CG31459(dist=1825),CG4662(dist=3453)    | 15669592 | intergenic | C       | T      |
| Hs6st                                   | 15770004 | intronic   | TT      | -      |
| Hs6st                                   | 15820884 | intronic   | C       | T      |
| Hs6st                                   | 15833422 | intronic   | C       | T      |
| CR42836(dist=16208),CG5023(dist=13307)  | 15981851 | intergenic | C       | T      |
| CG42801,mun                             | 16263200 | intronic   | TGTTG   | TAGTTG |
| mun                                     | 16282181 | intronic   | T       | C      |
| CG4288(dist=12960),MtnE(dist=8872)      | 16351129 | intergenic | C       | T      |

|                                       |          |            |    |      |
|---------------------------------------|----------|------------|----|------|
| GluRIIE                               | 16470314 | UTR3       | C  | T    |
| CG42322                               | 16579024 | intronic   | T  | C    |
| TotZ                                  | 16702894 | upstream   | C  | T    |
| CR43453(dist=14621),CG7922(dist=1212) | 17306835 | intergenic | T  | G    |
| C15                                   | 17335220 | intronic   | C  | T    |
| CG31176                               | 17498870 | intronic   | T  | A    |
| CG31176                               | 17525573 | intronic   | C  | T    |
| CG31176                               | 17533636 | intronic   | A  | T    |
| CG31176                               | 17533638 | intronic   | C  | G    |
| Rpl12                                 | 17603143 | exonic     | C  | T    |
| CG6678(dist=2988),CG6690(dist=1646)   | 17735892 | intergenic | T  | G    |
| CG17843(dist=3926),Eip93F(dist=29642) | 17745194 | intergenic | C  | T    |
| Eip93F                                | 17801426 | UTR5       | A  | T    |
| SKIP                                  | 18058695 | intronic   | -  | AAAC |
| SKIP                                  | 18076512 | intronic   | TT | -    |
| SKIP                                  | 18097849 | intronic   | C  | T    |
| CG7084                                | 18125649 | intronic   | G  | C    |
| CG5380                                | 18192234 | exonic     | C  | T    |
| loco                                  | 18451232 | intronic   | C  | T    |
| CG42686                               | 18487544 | intronic   | T  | C    |
| CG7029                                | 18617740 | intronic   | C  | T    |
| CG13829(dist=4083),CG13836(dist=2981) | 18991143 | intergenic | T  | A    |
| cnc                                   | 19013806 | exonic     | C  | T    |
| CG13826,cnc                           | 19051363 | intronic   | C  | T    |
| pnt                                   | 19152413 | intronic   | C  | T    |
| CG42828(dist=1425),CG4393(dist=1545)  | 19201388 | intergenic | -  | A    |
| CG4393                                | 19205576 | exonic     | C  | T    |
| CG16732                               | 19360633 | UTR3       | G  | A    |
| CG16732                               | 19360636 | UTR3       | G  | T    |
| CG16732                               | 19360644 | UTR3       | -  | CCT  |
| CG16732                               | 19360653 | UTR3       | G  | T    |
| CG16723                               | 19419430 | exonic     | C  | T    |
| sba                                   | 19728350 | intronic   | C  | T    |
| Gdh                                   | 19767892 | intronic   | T  | G    |
| CG6364                                | 20116728 | exonic     | C  | T    |
| BRWD3                                 | 20146407 | exonic     | C  | T    |
| CG5728                                | 20155938 | exonic     | T  | A    |
| CG6454                                | 20177334 | exonic     | C  | T    |
| CG5789                                | 20366501 | exonic     | C  | T    |
| Esyt2                                 | 20373080 | intronic   | G  | C    |
| CG13624                               | 20404724 | intronic   | C  | T    |
| tok                                   | 20561347 | intronic   | C  | T    |
| Ast                                   | 20588817 | intronic   | C  | T    |
| CG13639,CG31105                       | 20686200 | upstream   | C  | T    |

|                                         |          |                     |      |        |
|-----------------------------------------|----------|---------------------|------|--------|
| CG13646(dist=10247),tnc(dist=24598)     | 20785508 | intergenic          | -    | GGG    |
| CG11859                                 | 21091753 | exonic              | C    | T      |
| Dhap-at                                 | 21311750 | UTR3                | C    | T      |
| Nf1                                     | 21817722 | intronic            | T    | A      |
| CG33970                                 | 22185424 | intronic            | C    | T      |
| CG6490                                  | 22357857 | exonic              | T    | A      |
| CG6490                                  | 22359257 | intronic            | C    | T      |
| CG14247(dist=5410),CG42789(dist=39606)  | 22569725 | intergenic          | C    | T      |
| Tl                                      | 22629349 | intronic            | ACAC | -      |
| Lerp                                    | 22683019 | intronic            | C    | T      |
| sda                                     | 22756554 | intronic            | A    | T      |
| CG31075                                 | 22813825 | intronic            | A    | T      |
| CG31075;CG31076                         | 22814423 | upstream;downstream | G    | -      |
| TwdlC                                   | 22819808 | upstream            | -    | C      |
| eater                                   | 22922838 | exonic              | T    | A      |
| Tusp                                    | 23444104 | intronic            | C    | T      |
| CG12880                                 | 23514153 | intronic            | -    | AA     |
| CG12880                                 | 23518778 | downstream          | G    | A      |
| CG34353                                 | 23614819 | exonic              | T    | C      |
| CG34353                                 | 23719663 | intronic            | A    | -      |
| CG4849                                  | 23791450 | exonic              | C    | T      |
| CG34362                                 | 23884030 | intronic            | C    | T      |
| CG34362(dist=23308),CG34354(dist=37754) | 23934792 | intergenic          | C    | T      |
| CG34354                                 | 24020685 | intronic            | -    | CACACA |
| CG34354(dist=14165),CG43125(dist=9340)  | 24079117 | intergenic          | A    | G      |
| CG34354(dist=14166),CG43125(dist=9339)  | 24079118 | intergenic          | T    | G      |
| larp                                    | 24158516 | intronic            | C    | T      |
| Or98b(dist=17480),beat-VI(dist=47222)   | 24196704 | intergenic          | C    | T      |
| CG12413(dist=2670),fkh(dist=33611)      | 24373194 | intergenic          | A    | G      |
| CG14061(dist=25895),CG34295(dist=5487)  | 24609851 | intergenic          | GG   | -      |
| Doa                                     | 24722056 | intronic            | C    | T      |
| CG14521                                 | 24758553 | intronic            | -    | CC     |
| CG14521                                 | 24766319 | intronic            | C    | T      |
| Ptp99A                                  | 25205232 | intronic            | C    | T      |
| Ptp99A                                  | 25250954 | intronic            | -    | T      |
| Ptp99A                                  | 25284708 | intronic            | C    | T      |
| Trc8(dist=6349),CG2014(dist=5667)       | 25335868 | intergenic          | A    | C      |
| alph                                    | 25432194 | intronic            | TTTG | -      |
| alph                                    | 25440444 | intronic            | C    | T      |
| DopR2                                   | 25461861 | intronic            | C    | T      |
| DopR2                                   | 25483192 | intronic            | -    | ACAC   |
| Ice                                     | 25626875 | UTR3                | T    | A      |
| neo                                     | 25650196 | exonic              | C    | T      |
| CG31036                                 | 25734736 | intronic            | C    | T      |

|                                         |          |            |    |     |
|-----------------------------------------|----------|------------|----|-----|
| CG31036                                 | 25734739 | intronic   | T  | A   |
| Takr99D                                 | 25795298 | upstream   | C  | A   |
| CG9747                                  | 26015220 | intronic   | C  | T   |
| CecC(dist=5302),CG43448(dist=14855)     | 26047961 | intergenic | T  | -   |
| Fer2LCH(dist=18778),CG2217(dist=9405)   | 26235084 | intergenic | C  | T   |
| tmod                                    | 26399361 | intronic   | C  | T   |
| CG34433(dist=21818),Spn100A(dist=17968) | 26498398 | intergenic | C  | T   |
| CR43238(dist=11297),zfh1(dist=7457)     | 26584191 | intergenic | C  | T   |
| Cpr100A                                 | 26694389 | exonic     | C  | T   |
| 5-HT7(dist=3079),CG33773(dist=15420)    | 26845648 | intergenic | T  | A   |
| Gycbeta100B                             | 26962505 | intronic   | C  | T   |
| Gycbeta100B                             | 26977003 | intronic   | TT | -   |
| CG18672                                 | 27086714 | exonic     | C  | T   |
| CG11333(dist=4799),mey(dist=30316)      | 27294645 | intergenic | C  | T   |
| mey(dist=24553),nyo(dist=11485)         | 27357269 | intergenic | C  | A   |
| mey(dist=24555),nyo(dist=11483)         | 27357271 | intergenic | T  | G   |
| nyo                                     | 27378387 | intronic   | C  | T   |
| CG2135                                  | 27596217 | exonic     | C  | T   |
| sip3                                    | 27600505 | UTR3       | -  | AA  |
| heph                                    | 27698606 | intronic   | C  | T   |
| heph                                    | 27783497 | intronic   | -  | TTT |
| heph                                    | 27802266 | intronic   | C  | T   |
